# Supplementary material for: Economic Trends of Racial Disparities in Pediatric Postappendectomy Complications
Source: Oxford University Press journal article supplement (doi:10.1542/peds.2021-051328), 2021-09-16
Supplement: peds_2021051328supplementarydata.pdf [file peds_2021051328supplementarydata.pdf]

## Supplemental Information

**SUPPLEMENTAL TABLE 3** Twenty Most Common Surgical Complications and Their ICD Codes

| ICD Codes | ICD Description                                                                | Frequency |
|-----------|--------------------------------------------------------------------------------|-----------|
| 9974      | Digestive system complications not elsewhere classified                        | 1518      |
| 99859     | Other postoperative infection                                                  | 597       |
| 99749     | Other digestive system complications                                           | 553       |
| 99889     | Other specified complications of procedures not elsewhere classified           | 427       |
| 9973      | Respiratory complications not elsewhere classified                             | 193       |
| K913      | Postprocedural intestinal obstruction                                          | 136       |
| 9975      | Urinary complications, not elsewhere classified                                | 121       |
| 9982      | Accidental puncture or laceration during a procedure, not elsewhere classified | 117       |
| K9189     | Other postprocedural complications and disorders of digestive system           | 85        |
| 99739     | Other respiratory complications                                                | 83        |
| 99811     | Hemorrhage complicating a procedure                                            | 77        |
| 99812     | Hematoma complicating a procedure                                              | 64        |
| 5184      | Acute edema of lung, unspecified                                               | 59        |
| 5185      | Pulmonary insufficiency following trauma and surgery                           | 55        |
| T814XXA   | Infection following a procedure, initial encounter                             | 49        |
| 9971      | Surgical complications-heart                                                   | 44        |
| 99832     | Disruption external operative wound                                            | 25        |
| J9589     | Other postprocedural complications and disorders of respiratory system         | 24        |
| 5644      | Other postoperative functional disorders                                       | 21        |
| 9992      | Other vascular complications of medical care, not elsewhere classified         | 14        |

The complete list of ICD codes flagged as surgical complications, according to the Pediatric Health Information System definition, can be found through the children's hospital association Web site: <https://www.childrenshospitals.org/~media/Files/Groups/PHIS/Reference%20Resources/Data%20Content/Other%20Materials/FlagsInfection%20Med%20Comp%20Surg%20Comp%20Current%20List.pdf>.
